# Supplementary material
Source: ML conference proceedings conference paper supplement (https://proceedings.neurips.cc/paper_files/paper/2022/hash/872f0e04ef95be7970d9a9d74b198fdf-Abstract.html)
Supplement: Supplementary file 1 [file 872f0e04ef95be7970d9a9d74b198fdf-Supplemental-Datasets_and_Benchmarks.zip]

Archive with 7 entries (7 files):
- classification_script.py
- generation_script.py
- interpolation_script.py
- kmeans_script.py
- reconstruction_script.py
- Supplementary_materials.pdf
- training_script.py
