# Supplementary material
Source: ML conference proceedings conference paper supplement (https://proceedings.neurips.cc/paper_files/paper/2022/hash/872f0e04ef95be7970d9a9d74b198fdf-Abstract.html)
Supplement: Supplementary file 1 [file 872f0e04ef95be7970d9a9d74b198fdf-Supplemental-Datasets_and_Benchmarks.zip › training_script.py]

import argparse
import datetime
import logging
import os
from time import time

import numpy as np
import torch

from pythae.data.preprocessors import DataProcessor
from pythae.models import RHVAE
from pythae.models.rhvae import RHVAEConfig
from pythae.pipelines import TrainingPipeline
from pythae.trainers import (
    BaseTrainerConfig,
    CoupledOptimizerTrainerConfig,
    AdversarialTrainerConfig,
)

logger = logging.getLogger(__name__)
console = logging.StreamHandler()
logger.addHandler(console)
logger.setLevel(logging.INFO)

PATH = os.path.dirname(os.path.abspath(__file__))

ap = argparse.ArgumentParser()

# Training setting
ap.add_argument(
    "--dataset",
    type=str,
    default="mnist",
    choices=["mnist", "cifar10", "celeba"],
    help="The data set to use to perform training. It must be located in the folder 'data' at the "
    "path 'data/datset_name/' and contain a 'train_data.npz' and a 'eval_data.npz' file with the "
    "data being under the key 'data'. The data must be in the range [0-255] and shaped with the "
    "channel in first position (im_channel x height x width).",
    required=True,
)
ap.add_argument(
    "--model_name",
    help="The name of the model to train",
    choices=[
        "ae",
        "vae",
        "beta_vae",
        "iwae",
        "wae",
        "info_vae",
        "rae_gp",
        "rae_l2",
        "vamp",
        "hvae",
        "rhvae",
        "aae",
        "vaegan",
        "vqvae",
        "msssim_vae",
        "svae",
        "disentangled_beta_vae",
        "factor_vae",
        "beta_tc_vae",
        "vae_nf",
        "vae_iaf",
        "vae_lin_nf",
    ],
    required=True,
)
ap.add_argument(
    "--model_config",
    help="path to model config file (expected json file)",
    default=None,
)
ap.add_argument(
    "--nn",
    help="neural nets to use",
    default="convnet",
    choices=["default", "convnet","resnet"]
)
ap.add_argument(
    "--training_config",
    help="path to training config_file (expected json file)",
    default=os.path.join(PATH, "configs/base_training_config.json"),
)
ap.add_argument(
    "--use_wandb",
    help="whether to log the metrics in wandb",
    action="store_true",
)
ap.add_argument(
    "--wandb_project",
    help="wandb project name",
    default="rebuttal_trainings", ####################
)
ap.add_argument(
    "--wandb_entity",
    help="wandb entity name",
    default="benchmark_team",
)

args = ap.parse_args()


def main(args):

    if args.dataset == "mnist":

        if args.nn == "convnet":

            from pythae.models.nn.benchmarks.mnist import Encoder_Conv_AE_MNIST as Encoder_AE
            from pythae.models.nn.benchmarks.mnist import Encoder_Conv_VAE_MNIST as Encoder_VAE
            from pythae.models.nn.benchmarks.mnist import Encoder_Conv_SVAE_MNIST as Encoder_SVAE
            #from pythae.models.nn.benchmarks.mnist import Encoder_Conv_AE_MNIST as Encoder_VQVAE
            from pythae.models.nn.benchmarks.mnist import Decoder_Conv_AE_MNIST as Decoder_AE
            #from pythae.models.nn.benchmarks.mnist import Decoder_Conv_AE_MNIST as Decoder_VQVAE

        elif args.nn == "resnet":
            from pythae.models.nn.benchmarks.mnist import Encoder_ResNet_AE_MNIST as Encoder_AE
            from pythae.models.nn.benchmarks.mnist import Encoder_ResNet_VAE_MNIST as Encoder_VAE
            from pythae.models.nn.benchmarks.mnist import Encoder_ResNet_SVAE_MNIST as Encoder_SVAE
            #from pythae.models.nn.benchmarks.mnist import Encoder_ResNet_VQVAE_MNIST as Encoder_VQVAE
            from pythae.models.nn.benchmarks.mnist import Decoder_ResNet_AE_MNIST as Decoder_AE
            #from pythae.models.nn.benchmarks.mnist import Decoder_ResNet_VQVAE_MNIST as Decoder_VQVAE
        
        
        from pythae.models.nn.benchmarks.mnist import (
            Discriminator_Conv_MNIST as Discriminator,
        )

    elif args.dataset == "cifar10":

        if args.nn == "convnet":

            from pythae.models.nn.benchmarks.cifar import Encoder_Conv_AE_CIFAR as Encoder_AE
            from pythae.models.nn.benchmarks.cifar import Encoder_Conv_VAE_CIFAR as Encoder_VAE
            from pythae.models.nn.benchmarks.cifar import Encoder_Conv_SVAE_CIFAR as Encoder_SVAE
            #from pythae.models.nn.benchmarks.cifar import Encoder_Conv_AE_CIFAR as Encoder_VQVAE
            from pythae.models.nn.benchmarks.cifar import Decoder_Conv_AE_CIFAR as Decoder_AE
            #from pythae.models.nn.benchmarks.cifar import Decoder_Conv_AE_CIFAR as Decoder_VQVAE

        elif args.nn == "resnet":
            from pythae.models.nn.benchmarks.cifar import Encoder_ResNet_AE_CIFAR as Encoder_AE
            from pythae.models.nn.benchmarks.cifar import Encoder_ResNet_VAE_CIFAR as Encoder_VAE
            from pythae.models.nn.benchmarks.cifar import Encoder_ResNet_SVAE_CIFAR as Encoder_SVAE
            #from pythae.models.nn.benchmarks.cifar import Encoder_ResNet_VQVAE_CIFAR as Encoder_VQVAE
            from pythae.models.nn.benchmarks.cifar import Decoder_ResNet_AE_CIFAR as Decoder_AE
            #from pythae.models.nn.benchmarks.cifar import Decoder_ResNet_VQVAE_CIFAR as Decoder_VQVAE

        from pythae.models.nn.benchmarks.cifar import (
            Discriminator_Conv_CIFAR as Discriminator,
        )

    elif args.dataset == "celeba":

        if args.nn == "convnet":

            from pythae.models.nn.benchmarks.celeba import Encoder_Conv_AE_CELEBA as Encoder_AE
            from pythae.models.nn.benchmarks.celeba import Encoder_Conv_VAE_CELEBA as Encoder_VAE
            from pythae.models.nn.benchmarks.celeba import Encoder_Conv_SVAE_CELEBA as Encoder_SVAE
            #from pythae.models.nn.benchmarks.celeba import Encoder_Conv_AE_CELEBA as Encoder_VQVAE
            from pythae.models.nn.benchmarks.celeba import Decoder_Conv_AE_CELEBA as Decoder_AE
            #from pythae.models.nn.benchmarks.celeba import Decoder_Conv_AE_CELEBA as Decoder_VQVAE

        elif args.nn == "resnet":
            from pythae.models.nn.benchmarks.celeba import Encoder_ResNet_AE_CELEBA as Encoder_AE
            from pythae.models.nn.benchmarks.celeba import Encoder_ResNet_VAE_CELEBA as Encoder_VAE
            from pythae.models.nn.benchmarks.celeba import Encoder_ResNet_SVAE_CELEBA as Encoder_SVAE
            #from pythae.models.nn.benchmarks.celeba import Encoder_ResNet_VQVAE_CELEBA as Encoder_VQVAE
            from pythae.models.nn.benchmarks.celeba import Decoder_ResNet_AE_CELEBA as Decoder_AE
            #from pythae.models.nn.benchmarks.celeba import Decoder_ResNet_VQVAE_CELEBA as Decoder_VQVAE

        from pythae.models.nn.benchmarks.celeba import (
            Discriminator_Conv_CELEBA as Discriminator,
        )

    try:
        logger.info(f"\nLoading {args.dataset} data...\n")
        train_data = (
            np.load(os.path.join(PATH, f"data/{args.dataset}", "train_data.npz"))[
                "data"
            ]
            / 255.0
        )
        eval_data = (
            np.load(os.path.join(PATH, f"data/{args.dataset}", "eval_data.npz"))["data"]
            / 255.0
        )

        train_data = np.concatenate((train_data, eval_data))[:-10000] #################
        eval_data = np.concatenate((train_data, eval_data))[10000:]   #################
    except Exception as e:
        raise FileNotFoundError(
            f"Unable to load the data from 'data/{args.dataset}' folder. Please check that both a "
            "'train_data.npz' and 'eval_data.npz' are present in the folder.\n Data must be "
            " under the key 'data', in the range [0-255] and shaped with channel in first "
            "position\n"
            f"Exception raised: {type(e)} with message: " + str(e)
        ) from e

    logger.info("Successfully loaded data !\n")
    logger.info("------------------------------------------------------------")
    logger.info("Dataset \t \t Shape \t \t \t Range")
    logger.info(
        f"{args.dataset.upper()} train data: \t {train_data.shape} \t [{train_data.min()}-{train_data.max()}] "
    )
    logger.info(
        f"{args.dataset.upper()} eval data: \t {eval_data.shape} \t [{eval_data.min()}-{eval_data.max()}]"
    )
    logger.info("------------------------------------------------------------\n")

    data_input_dim = tuple(train_data.shape[1:])

    if args.model_name == "ae":
        from pythae.models import AE, AEConfig

        if args.model_config is not None:
            model_config = AEConfig.from_json_file(args.model_config)

        else:
            model_config = AEConfig()

        model_config.input_dim = data_input_dim

        model = AE(
            model_config=model_config,
            encoder=Encoder_AE(model_config),
            decoder=Decoder_AE(model_config),
        )

    elif args.model_name == "vae":
        from pythae.models import VAE, VAEConfig

        if args.model_config is not None:
            model_config = VAEConfig.from_json_file(args.model_config)

        else:
            model_config = VAEConfig()

        model_config.input_dim = data_input_dim

        model = VAE(
            model_config=model_config,
            encoder=Encoder_VAE(model_config),
            decoder=Decoder_AE(model_config),
        )

    elif args.model_name == "iwae":
        from pythae.models import IWAE, IWAEConfig

        if args.model_config is not None:
            model_config = IWAEConfig.from_json_file(args.model_config)

        else:
            model_config = IWAEConfig()

        model_config.input_dim = data_input_dim

        model = IWAE(
            model_config=model_config,
            encoder=Encoder_VAE(model_config),
            decoder=Decoder_AE(model_config),
        )

    elif args.model_name == "info_vae":
        from pythae.models import INFOVAE_MMD, INFOVAE_MMD_Config

        if args.model_config is not None:
            model_config = INFOVAE_MMD_Config.from_json_file(args.model_config)

        else:
            model_config = INFOVAE_MMD_Config()

        model_config.input_dim = data_input_dim

        model = INFOVAE_MMD(
            model_config=model_config,
            encoder=Encoder_VAE(model_config),
            decoder=Decoder_AE(model_config),
        )

    elif args.model_name == "wae":
        from pythae.models import WAE_MMD, WAE_MMD_Config

        if args.model_config is not None:
            model_config = WAE_MMD_Config.from_json_file(args.model_config)

        else:
            model_config = WAE_MMD_Config()

        model_config.input_dim = data_input_dim

        model = WAE_MMD(
            model_config=model_config,
            encoder=Encoder_AE(model_config),
            decoder=Decoder_AE(model_config),
        )

    elif args.model_name == "rae_l2":
        from pythae.models import RAE_L2, RAE_L2_Config

        if args.model_config is not None:
            model_config = RAE_L2_Config.from_json_file(args.model_config)

        else:
            model_config = RAE_L2_Config()

        model_config.input_dim = data_input_dim

        model = RAE_L2(
            model_config=model_config,
            encoder=Encoder_AE(model_config),
            decoder=Decoder_AE(model_config),
        )

    elif args.model_name == "rae_gp":
        from pythae.models import RAE_GP, RAE_GP_Config

        if args.model_config is not None:
            model_config = RAE_GP_Config.from_json_file(args.model_config)

        else:
            model_config = RAE_GP_Config()

        model_config.input_dim = data_input_dim

        model = RAE_GP(
            model_config=model_config,
            encoder=Encoder_AE(model_config),
            decoder=Decoder_AE(model_config),
        )

    elif args.model_name == "vamp":
        from pythae.models import VAMP, VAMPConfig

        if args.model_config is not None:
            model_config = VAMPConfig.from_json_file(args.model_config)

        else:
            model_config = VAMPConfig()

        model_config.input_dim = data_input_dim

        model = VAMP(
            model_config=model_config,
            encoder=Encoder_VAE(model_config),
            decoder=Decoder_AE(model_config),
        )

    elif args.model_name == "beta_vae":
        from pythae.models import BetaVAE, BetaVAEConfig

        if args.model_config is not None:
            model_config = BetaVAEConfig.from_json_file(args.model_config)

        else:
            model_config = BetaVAEConfig()

        model_config.input_dim = data_input_dim

        model = BetaVAE(
            model_config=model_config,
            encoder=Encoder_VAE(model_config),
            decoder=Decoder_AE(model_config),
        )

    elif args.model_name == "hvae":
        from pythae.models import HVAE, HVAEConfig

        if args.model_config is not None:
            model_config = HVAEConfig.from_json_file(args.model_config)

        else:
            model_config = HVAEConfig()

        model_config.input_dim = data_input_dim

        model = HVAE(
            model_config=model_config,
            encoder=Encoder_VAE(model_config),
            decoder=Decoder_AE(model_config),
        )

    elif args.model_name == "rhvae":
        from pythae.models import RHVAE, RHVAEConfig

        if args.model_config is not None:
            model_config = RHVAEConfig.from_json_file(args.model_config)

        else:
            model_config = RHVAEConfig()

        model_config.input_dim = data_input_dim

        model = RHVAE(
            model_config=model_config,
            encoder=Encoder_VAE(model_config),
            decoder=Decoder_AE(model_config),
        )

    elif args.model_name == "aae":
        from pythae.models import Adversarial_AE, Adversarial_AE_Config

        if args.model_config is not None:
            model_config = Adversarial_AE_Config.from_json_file(args.model_config)

        else:
            model_config = Adversarial_AE_Config()

        model_config.input_dim = data_input_dim

        model = Adversarial_AE(
            model_config=model_config,
            encoder=Encoder_VAE(model_config),
            decoder=Decoder_AE(model_config),
        )

    elif args.model_name == "vaegan":
        from pythae.models import VAEGAN, VAEGANConfig

        if args.model_config is not None:
            model_config = VAEGANConfig.from_json_file(args.model_config)

        else:
            model_config = VAEGANConfig()

        model_config.input_dim = data_input_dim

        model = VAEGAN(
            model_config=model_config,
            encoder=Encoder_VAE(model_config),
            decoder=Decoder_AE(model_config),
            discriminator=Discriminator(model_config),
        )

    elif args.model_name == "vqvae":
        from pythae.models import VQVAE, VQVAEConfig

        if args.model_config is not None:
            model_config = VQVAEConfig.from_json_file(args.model_config)

        else:
            model_config = VQVAEConfig()

        model_config.input_dim = data_input_dim

        model = VQVAE(
            model_config=model_config,
            encoder=Encoder_AE(model_config),
            decoder=Decoder_AE(model_config),
        )

    elif args.model_name == "msssim_vae":
        from pythae.models import MSSSIM_VAE, MSSSIM_VAEConfig

        if args.model_config is not None:
            model_config = MSSSIM_VAEConfig.from_json_file(args.model_config)

        else:
            model_config = MSSSIM_VAEConfig()

        model_config.input_dim = data_input_dim

        model = MSSSIM_VAE(
            model_config=model_config,
            encoder=Encoder_VAE(model_config),
            decoder=Decoder_AE(model_config),
        )

    elif args.model_name == "svae":
        from pythae.models import SVAE, SVAEConfig

        if args.model_config is not None:
            model_config = SVAEConfig.from_json_file(args.model_config)

        else:
            model_config = SVAE()

        model_config.input_dim = data_input_dim

        model = SVAE(
            model_config=model_config,
            encoder=Encoder_SVAE(model_config),
            decoder=Decoder_AE(model_config),
        )

    elif args.model_name == "disentangled_beta_vae":
        from pythae.models import DisentangledBetaVAE, DisentangledBetaVAEConfig

        if args.model_config is not None:
            model_config = DisentangledBetaVAEConfig.from_json_file(args.model_config)

        else:
            model_config = DisentangledBetaVAEConfig()

        model_config.input_dim = data_input_dim

        model = DisentangledBetaVAE(
            model_config=model_config,
            encoder=Encoder_VAE(model_config),
            decoder=Decoder_AE(model_config),
        )

    elif args.model_name == "factor_vae":
        from pythae.models import FactorVAE, FactorVAEConfig

        if args.model_config is not None:
            model_config = FactorVAEConfig.from_json_file(args.model_config)

        else:
            model_config = FactorVAEConfig()

        model_config.input_dim = data_input_dim

        model = FactorVAE(
            model_config=model_config,
            encoder=Encoder_VAE(model_config),
            decoder=Decoder_AE(model_config),
        )

    elif args.model_name == "beta_tc_vae":
        from pythae.models import BetaTCVAE, BetaTCVAEConfig

        if args.model_config is not None:
            model_config = BetaTCVAEConfig.from_json_file(args.model_config)

        else:
            model_config = BetaTCVAEConfig()

        model_config.input_dim = data_input_dim

        model = BetaTCVAE(
            model_config=model_config,
            encoder=Encoder_VAE(model_config),
            decoder=Decoder_AE(model_config),
        )

    elif args.model_name == "vae_iaf":
        from pythae.models import VAE_IAF, VAE_IAF_Config

        if args.model_config is not None:
            model_config = VAE_IAF_Config.from_json_file(args.model_config)

        else:
            model_config = VAE_IAF_Config()

        model_config.input_dim = data_input_dim

        model = VAE_IAF(
            model_config=model_config,
            encoder=Encoder_VAE(model_config),
            decoder=Decoder_AE(model_config),
        )

    elif args.model_name == "vae_lin_nf":
        from pythae.models import VAE_LinNF, VAE_LinNF_Config

        if args.model_config is not None:
            model_config = VAE_LinNF_Config.from_json_file(args.model_config)

        else:
            model_config = VAE_LinNF_Config()

        model_config.input_dim = data_input_dim

        model = VAE_LinNF(
            model_config=model_config,
            encoder=Encoder_VAE(model_config),
            decoder=Decoder_AE(model_config),
        )

        print(model)

    logger.info(f"Successfully build {args.model_name.upper()} model !\n")

    encoder_num_param = sum(
        p.numel() for p in model.encoder.parameters() if p.requires_grad
    )
    decoder_num_param = sum(
        p.numel() for p in model.decoder.parameters() if p.requires_grad
    )
    total_num_param = sum(p.numel() for p in model.parameters() if p.requires_grad)
    logger.info(
        "----------------------------------------------------------------------"
    )
    logger.info("Model \t Encoder params \t Decoder params \t Total params")
    logger.info(
        f"{args.model_name.upper()} \t {encoder_num_param} \t \t {decoder_num_param}"
        f" \t \t {total_num_param}"
    )
    logger.info(
        "----------------------------------------------------------------------\n"
    )

    logger.info(f"Model config of {args.model_name.upper()}: {model_config}\n")

    if model.model_name == "RAE_L2":
        training_config = CoupledOptimizerTrainerConfig.from_json_file(
            args.training_config
        )

    elif model.model_name == "Adversarial_AE" or model.model_name == "FactorVAE":
        training_config = AdversarialTrainerConfig.from_json_file(args.training_config)

    elif model.model_name == "VAEGAN":
        from pythae.trainers import (
            CoupledOptimizerAdversarialTrainer,
            CoupledOptimizerAdversarialTrainerConfig,
        )

        training_config = CoupledOptimizerAdversarialTrainerConfig.from_json_file(
            args.training_config
        )

    else:
        training_config = BaseTrainerConfig.from_json_file(args.training_config)

    # reset the `output_dir` to allow job-arrays
    slurm_array_task_id = int(os.environ["SLURM_ARRAY_TASK_ID"])

    training_config.output_dir = os.path.join(
        "rebuttal", f"{args.dataset}_trainings", f"{args.nn}", f"{model.model_name}".lower(), f"{slurm_array_task_id}" ########################
    )

    logger.info(f"Training config: {training_config}\n")

    callbacks = []

    if args.use_wandb:
        from pythae.trainers.training_callbacks import WandbCallback

        wandb_cb = WandbCallback()
        wandb_cb.setup(
            training_config,
            model_config=model_config,
            project_name=args.wandb_project,
            entity_name=args.wandb_entity,
        )

        callbacks.append(wandb_cb)

    pipeline = TrainingPipeline(training_config=training_config, model=model)

    pipeline(train_data=train_data, eval_data=eval_data, callbacks=callbacks)


if __name__ == "__main__":

    main(args)
